# Supplementary material for: Focused Ultrasound Stimulates ER Localized Mechanosensitive PANNEXIN-1 to Mediate Intracellular Calcium Release in Invasive Cancer Cells
Source: PubMed Central journal article supplement (PMC7325310; doi:10.3389/fcell.2020.00504), 2020-06-23
Supplement: Table_1.pdf [file Table_1.pdf]

**Table S 1.** Pharmacological agents used to investigate the mechanism of FUS-induced calcium rise in PC-3 cells.

| <b>Blocker/Inhibitor</b>      | <b>Company</b> | <b>Effect</b>                                  | <b>Concentration (<math>\mu\text{M}</math>)</b> | <b>Loading Time (min)</b> |
|-------------------------------|----------------|------------------------------------------------|-------------------------------------------------|---------------------------|
| Suramin                       | Sigma-Aldrich  | P2X and P2Y receptor antagonist                | 100                                             | 15                        |
| Apyrase (grade I )            | Sigma-Aldrich  | Degradation of extracellular ATP               | 20-50 units/ml                                  | 15                        |
| Flufenamic acid               | Tocris         | GAP junction inhibitor                         | 100-200                                         | 30                        |
| PPADS                         | Sigma-Aldrich  | P2 purinergic receptor antagosist              | 100                                             | 30                        |
| Probenecid                    | Probenecid     | Pannexin1 inhibitor                            | 10                                              | 15-30                     |
| Carbenoxolone (CBX)           | Sigma-Aldrich  | Pannexin1 inhibitor                            | 200                                             | 15-30                     |
| <sup>10</sup> Panx1           | Tocris         | Pannexin1 inhibitor                            | 100                                             | 15-30                     |
| Scrambled <sup>10</sup> Panx1 | Tocris         | Control for <sup>10</sup> Panx1                | 100                                             | 15-30                     |
| Thasigargin                   | Sigma-Aldrich  | Intracellular Ca <sup>2+</sup> store inhibitor | 10                                              | 30                        |
| BTP2                          | Sigma-Aldrich  | CRAC (STIM1) inhibitor                         | 3                                               | 30                        |
| Xestospongine C               | R&D Biotec.    | IP3Rs inhibitor                                | 2                                               | 30                        |
| SKF96365                      | SKF96365       | TRP inhibitor                                  | 30                                              | 30                        |
| MRS2179                       | Sigma-Aldrich  | P2Y1 receptor antagonist                       | 10                                              | 30                        |
| AZ11645373                    | Sigma-Aldrich  | P2X7 selective inhibitor                       | 3                                               | 20-30                     |
| Cytochalasin D                | Sigma-Aldrich  | actin filament inhibitor                       | 2                                               | 30                        |
| Nocodazole                    | Sigma-Aldrich  | microtubule inhibitor                          | 1                                               | 30                        |
| ML-7                          | Cayman Chem    | actomyosin contractility inhibitor             | 5                                               | 30                        |
| (-)-Blebbistatin              | Cayman Chem    | actomyosin contractility inhibitor             | 5                                               | 30                        |
